# Supplementary material
Source: PubMed Central journal article supplement (PMC55841)
Supplement: nar_29_16_3394__1.pdf [file nar_29_16_3394__1.pdf]

## SUPPLEMENTARY MATERIAL

Table S1. Summary of structural probing data

| A         | WT Leader + 84nt 16S     |    |      |     |    |    | C3 Leader + 84nt 16S     |    |      |     |    |    |
|-----------|--------------------------|----|------|-----|----|----|--------------------------|----|------|-----|----|----|
|           | DMS                      | KE | DEPC | CVE | S1 | T1 | DMS                      | KE | DEPC | CVE | S1 | T1 |
| L- C40    |                          |    |      | +   |    |    |                          |    |      | ++  |    |    |
| L- U43    |                          |    |      | +   |    |    |                          |    |      | ++  |    |    |
| L- U45    |                          |    |      | +   |    |    |                          |    |      | ++  |    |    |
| L- U47    |                          |    |      | +   |    |    |                          |    |      | ++  |    |    |
| L- C48    |                          |    |      | +   |    |    |                          |    |      | ++  |    |    |
| L- G50    |                          | ++ |      |     |    |    |                          | +  |      |     |    |    |
| L- A51    |                          |    |      | +   |    |    |                          |    |      | ++  |    |    |
| L- C52    |                          |    |      | +   |    |    |                          |    |      | ++  |    |    |
| L- U65    |                          |    |      | +   |    |    |                          |    |      | ++  |    |    |
| L- C56    |                          |    |      | +   |    |    |                          |    |      | ++  |    |    |
| L- U57    |                          |    |      | +   |    |    |                          |    |      | ++  |    |    |
| L- U59    |                          |    |      | nd  |    |    |                          |    |      | +   |    |    |
| L- G63    |                          | nd |      |     |    |    |                          | ++ |      |     |    |    |
| L- A66    | ++                       |    |      | ++  |    |    | ++                       |    |      | +   |    |    |
| L- A71/72 | +                        |    | +    |     |    |    | +                        |    | ++   |     |    |    |
| L- U82    |                          |    |      | +   |    |    |                          |    |      | ++  |    |    |
| L- G92    |                          |    |      |     | +  |    |                          |    |      |     | nd |    |
| L- C93    | +                        |    |      |     | ++ |    | ++                       |    |      |     | +  |    |
| L- A94    | +                        |    |      |     | ++ |    | ++                       |    |      |     | +  |    |
| L- A95    | +                        |    |      |     |    |    | ++                       |    |      |     |    |    |
| L- A100   | ++                       |    | ++   |     |    |    | ++                       |    | nd   |     |    |    |
| L- A102   | +                        |    | +    |     |    |    | ++                       |    | ++   |     |    |    |
| L- A103   | +                        |    | nd   |     |    |    | ++                       |    | +    |     |    |    |
| L- A110   | +                        |    | ++   |     |    |    | ++                       |    | ++   |     |    |    |
| L- A121   | +                        |    | ++   |     |    |    | nd                       |    | ++   |     |    |    |
| L- A123   | +                        |    |      | nd  |    |    | +                        |    |      | +   |    |    |
| L- G124   |                          | ++ |      | +   |    |    |                          | ++ |      | ++  |    |    |
| L- A127   | ++                       |    | +    |     |    |    | +                        |    | nd   |     |    |    |
| L- A128   | ++                       |    |      |     |    |    | +                        |    |      |     |    |    |
| L- A130   | ++                       |    |      | ++  |    |    | +                        |    |      | ++  |    |    |
| L- U140   |                          |    |      | +   |    |    |                          |    |      | ++  |    |    |
| L- C143   |                          |    |      | ++  |    |    |                          |    |      | +   |    |    |
| L- U149   |                          |    |      | ++  |    |    |                          |    |      | +   |    |    |
| L- C155   | nd                       |    |      |     |    |    | +                        |    |      |     |    |    |
| L- U170   |                          |    |      | +   |    |    |                          |    |      | ++  |    |    |
| A3        |                          |    | nd   |     | ++ |    |                          |    | +    |     | ++ |    |
| U12       |                          |    |      | ++  |    |    |                          |    |      | +   |    |    |
| A19       | +                        |    | +    |     | +  |    | ++                       |    | nd   |     | nd |    |
| U24       |                          |    |      | ++  |    |    |                          |    |      | +   |    |    |
| G38       |                          | ++ |      |     | +  | +  |                          | ++ |      |     | nd | +  |
| G41       |                          | ++ |      |     | +  |    |                          | ++ |      |     | nd |    |
| G42       |                          | ++ |      |     | ++ | ++ |                          | ++ |      |     | +  | +  |
| C43       |                          |    |      |     | ++ | +  |                          |    |      |     | nd | nd |
| C47       |                          |    |      | nd  |    |    |                          |    |      | +   |    |    |
| C48       |                          |    |      | +   |    |    |                          |    |      | nd  |    |    |
| U49       |                          |    |      | nd  |    |    |                          |    |      | +   |    |    |
| A51       |                          |    |      | +   |    |    |                          |    |      | nd  |    |    |
| C52       |                          |    |      |     | nd |    |                          |    |      |     | +  |    |
| A53       |                          |    |      | +   |    |    |                          |    |      | nd  |    |    |
| C54       |                          |    |      |     | nd |    |                          |    |      |     | +  |    |
| A55       |                          |    |      | +   |    |    |                          |    |      | nd  |    |    |
| C58       |                          |    |      |     | nd |    |                          |    |      |     | +  |    |
| A59       | +                        |    |      | +   |    |    | ++                       |    |      | +   |    |    |
| A60       | +                        |    |      |     |    |    | ++                       |    |      |     |    |    |
| B         | WT Leader + complete 16S |    |      |     |    |    | C3 Leader + complete 16S |    |      |     |    |    |
|           | DMS                      | KE | DEPC | CVE | S1 | T1 | DMS                      | KE | DEPC | CVE | S1 | T1 |
| U813      |                          |    |      | nd  |    |    |                          |    |      | ++  |    |    |
| C862      |                          |    |      | nd  |    |    |                          |    |      | ++  |    |    |
| A892      |                          |    |      | nd  |    |    |                          |    |      | ++  |    |    |
| A906      |                          |    |      | nd  |    |    |                          |    |      | ++  |    |    |
| C         | WT Leader + 84nt 16S     |    |      |     |    |    | WT Leader + complete 16S |    |      |     |    |    |
|           | DMS                      | KE | DEPC | CVE | S1 | T1 | DMS                      | KE | DEPC | CVE | S1 | T1 |
| L- G144   |                          |    |      |     | nd | nd |                          |    |      |     | ++ | +  |
| L- G147   |                          |    |      |     | nd | nd |                          |    |      |     | ++ | +  |
| G15       |                          |    |      |     | nd | nd |                          |    |      |     | ++ | +  |
| G22       |                          |    |      |     | nd | nd |                          |    |      |     | ++ | +  |
| G27       |                          |    |      |     | nd | nd |                          |    |      |     | ++ | +  |
| G31       |                          | nd |      | ++  | nd | nd |                          | ++ |      | nd  | ++ | ++ |
| G39       |                          | ++ |      |     | +  | +  |                          | nd |      |     | +  | +  |
| G41       |                          | ++ |      |     | +  |    |                          | nd |      |     | nd |    |
| A44       |                          |    |      | nd  |    |    |                          |    |      | +   |    |    |
| G46       |                          | nd |      |     |    |    |                          | ++ |      |     |    |    |
| G57       |                          | nd |      |     | nd |    |                          | ++ |      |     | ++ |    |
| G61       |                          |    |      |     |    | nd |                          |    |      |     |    | ++ |

Different transcript regions are presented in (A), (B) and (C). The length of the respective transcripts and the probes used are given in the top rows, with sequence positions indicated in the left column. Relative accessibilities are indicated by: +, accessible; ++, highly accessible; nd, not detected. Only those positions where differences in modification or cleavage were detected are listed.
